# Supplementary material
Source: PubMed Central journal article supplement (PMC9581790)
Supplement: mmc2.pdf [file mmc2.pdf]

*International Journal of Infectious Diseases*  
**AUTHORSHIP AGREEMENT**

For all submissions to International Journal of Infectious Diseases (THEIJID), request of authorship change during review process should be made to the Editorial Office of THEIJID. The form below should be completed for any authorship changes including adding new authors, removing existing authors, reordering existing authors, or adjusting equal contributor status of existing authors. Corresponding author should confirm that all authors meet the criteria for authorship as outlined by Committee on Publication Ethics (COPE) and that all authors agree to the change. All authors who have been added, removed, or reordered need to confirm that they agree to the change by signing the form. Please fill and return this form in time. The concerned submission will be put on hold for further processing until the editorial office receives the completed form.

**Manuscript number:** THEIJID-D-22-00834

**Manuscript title:** Effect of Corticosteroids in Patients with COVID-19: A Bayesian Network Meta-analysis

**Would you like to change the authorship of your paper?** (Please tick one of the following):

- No (No signature is needed if selected)
- Yes (please fill in box below with all necessary signatures):

**The nature of change(s) in authorship** (Please check one of the following):

- Change de Corresponding Author:
- Add new author(s);
- Remove existing author(s);
- Change the order of authorship;
- Others (please specify):

**Detailed reason for the change:**

Prof. Chuanyuan Tao provided constructive suggestions and contributed greatly to the revision of the manuscript. Besides, Prof. Chao You, is about to retire from the hospital. Therefore, we suggest adding Prof. Lu Ma and Prof. Chuanyuan Tao from the same hospital as co-corresponding authors.

**Indicate the specific change:**

**Adding a new author**

|                              |                                                                                     |
|------------------------------|-------------------------------------------------------------------------------------|
| <b>Name</b>                  | Chuanyuan Tao                                                                       |
| <b>Email address</b>         | tcy106@163.com                                                                      |
| <b>Institution</b>           | Sichuan University West China Hospital                                              |
| <b>Specific contribution</b> | Synthesized the data, provided constructive suggestions, and revised the manuscript |

**Removing an existing author**

|                      |  |
|----------------------|--|
| <b>Name</b>          |  |
| <b>Email address</b> |  |

|                                 |  |
|---------------------------------|--|
| <b>Institution</b>              |  |
| <b>Agree to be acknowledged</b> |  |

**Complete author order AFTER change (please note any authors with equal contribution as first authors or corresponding authors)**

| <b>Order</b> | <b>Author name BEFORE change</b> | <b>Author name AFTER change</b> | <b>Signature</b> |
|--------------|----------------------------------|---------------------------------|------------------|
| 1            | Xing Wang                        | Xing Wang                       | Xing Wang        |
| 2            | Dingke Wen                       | Dingke Wen                      | Dingke Wen       |
| 3            | Qiang He                         | Qiang He                        | Qiang He         |
| 4            | Jingguo Yang                     | Jingguo Yang                    | Jingguo Yang     |
| 5            | Chao You                         | Chao You                        | Chao You         |
| 6            | Lu Ma                            | Chuanyuan Tao                   | Chuanyuan Tao    |
| 7            |                                  | Lu Ma                           | Lu Ma            |
| 8            |                                  |                                 |                  |
| 9            |                                  |                                 |                  |
| 10           |                                  |                                 |                  |

Approval of the final version of the manuscript to be submitted, all authors must sign the table above to indicate agreeing with the changed authorship (all authors must be listed, full name in print and signatures are needed from all).
